# Supplementary material
Source: PubMed Central journal article supplement (PMC6600933)
Supplement: pnas.1816039116.sapp.pdf [file pnas.1816039116.sapp.pdf]

1

## 2 **Supplementary Information for**

### 3 **The exploration of the chemical space and its three historical regimes**

4 **Eugenio J. Llanos, Wilmer Leal, Duc H. Luu, Jürgen Jost, Peter F. Stadler, and Guillermo Restrepo**

5 **Guillermo Restrepo.**

6 **E-mail: [restrepo@mis.mpg.de](mailto:restrepo@mis.mpg.de)**

#### 7 **This PDF file includes:**

8 Figs. S1 to S11

9 Tables S1 to S10

10 References for SI reference citations

11 **Variance analysis of the number of new compounds**

12 Table S1 contains the results of the Shapiro-Wilk and Kolmogorov-Smirnov normality tests for the growth rate  $r_t$  and for  
13  $Y_t = \ln s_{t+1} - \ln s_t$ . These results show that  $r_t$  is not normally distributed (Figure S1a), but  $Y_t$  is for the three historical  
14 regimes (Table 1, main text; Table S1, and Figure S1). The distribution and its density of the combined residuals  $Z_t := \frac{Y_t - \mu_i}{\sigma_i}$ ,  
15 where  $\mu_i, \sigma_i$  are given in Table 1, are shown in Figure S2.

**Table S1. Results of the Shapiro-Wilk and Kolmogorov-Smirnov normality tests for  $r_t$ ,  $Y_t$ , and  $Z_t$ .**

| Period    | $r_t$                     |                          | $Y_t$                     |                          | $Z_t$     |          |
|-----------|---------------------------|--------------------------|---------------------------|--------------------------|-----------|----------|
|           | $p^{ShW}$                 | $p^{KS}$                 | $p^{ShW}$                 | $p^{KS}$                 | $p^{ShW}$ | $p^{KS}$ |
| 1804-2015 | $< 2.2 \times 10^{-16}$   | $< 5.54 \times 10^{-14}$ | $< 4.143 \times 10^{-15}$ | $< 1.013 \times 10^{-6}$ | 0.01934   | 0.2637   |
| 1804-1860 | $< 6.986 \times 10^{-10}$ | 0.02414                  | 0.05267                   | 0.5133                   | 0.05267   | 0.5133   |
| 1861-1980 | 0.001877                  | 0.2138                   | 0.0701                    | 0.3391                   | 0.07010   | 0.3391   |
| 1981-2015 | 0.2027                    | 0.7196                   | 0.08297                   | 0.6242                   | 0.08297   | 0.6242   |

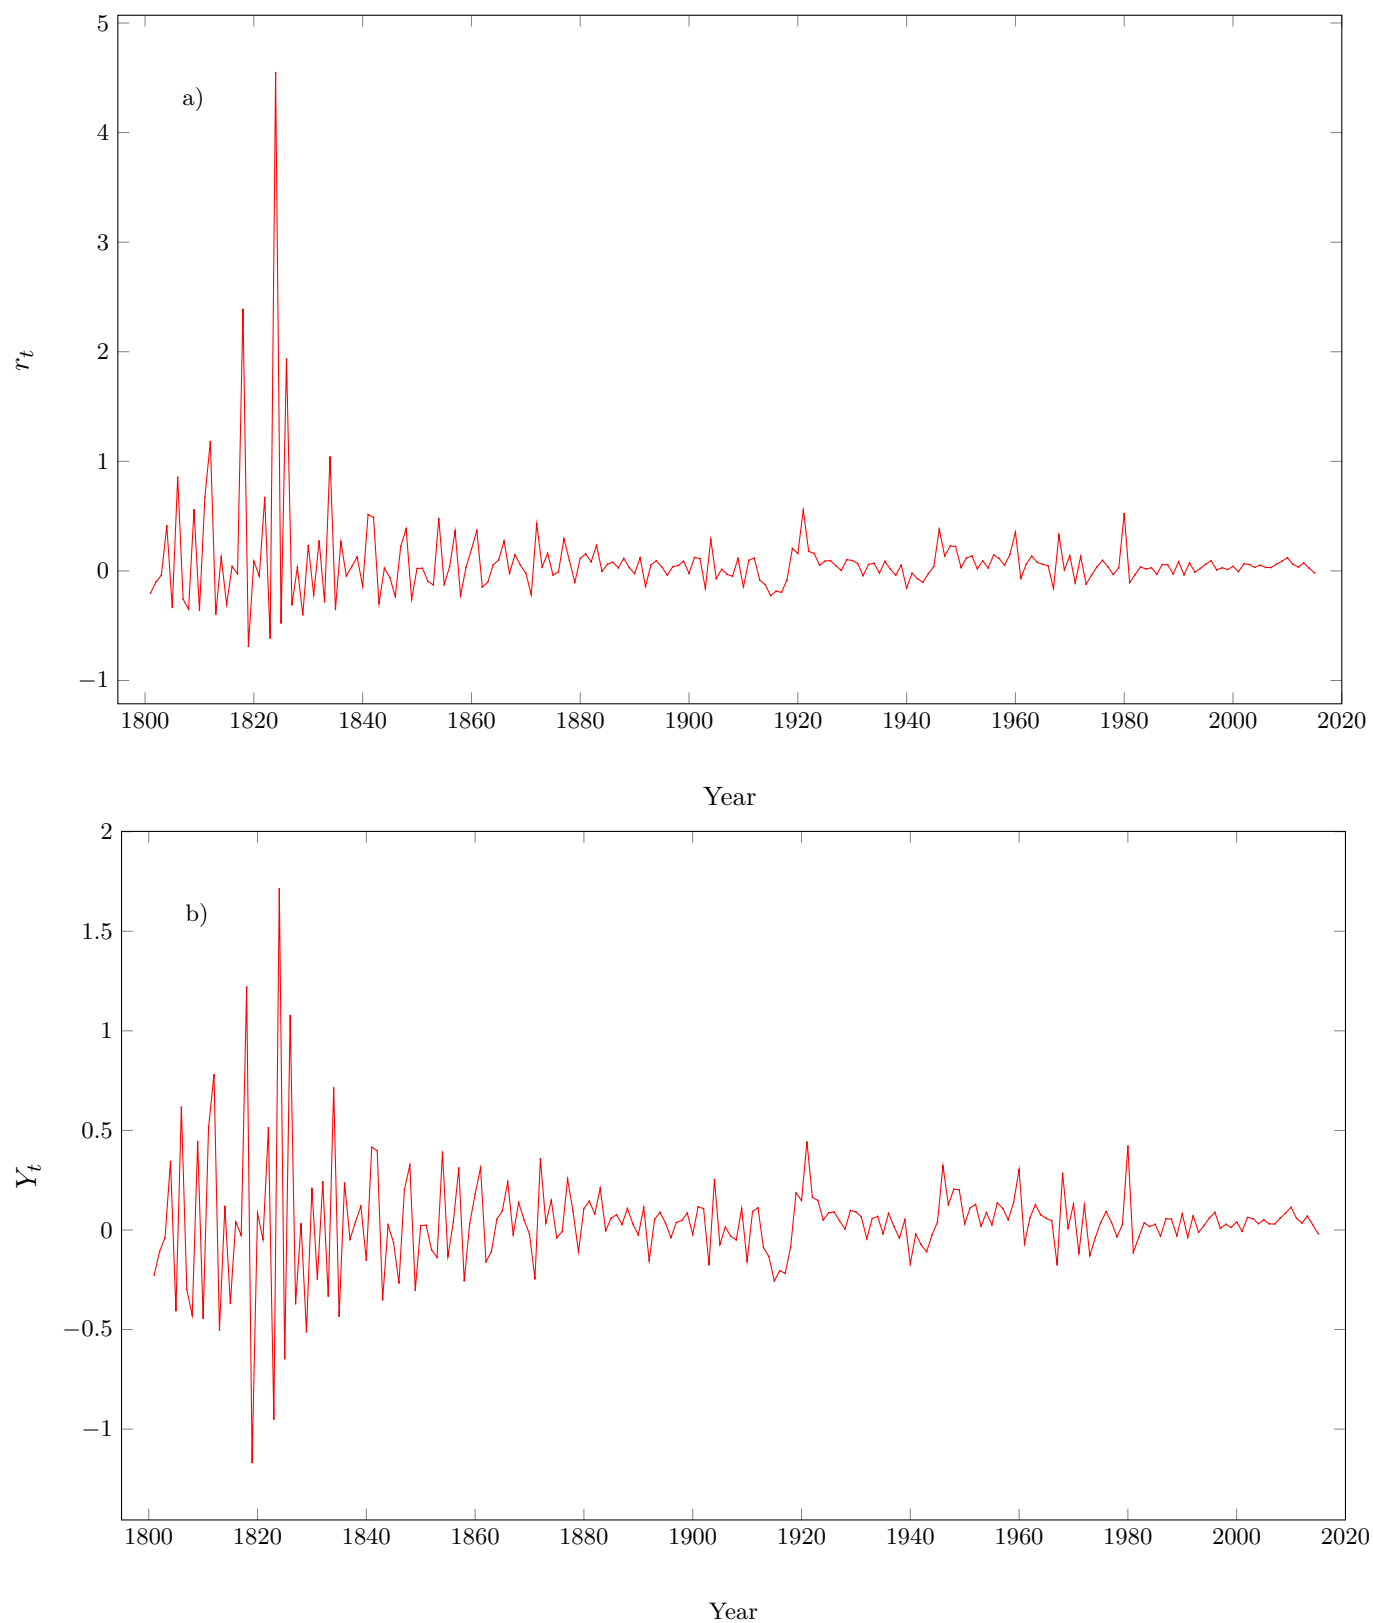

**Fig. S1.** a) Growth rate  $r_t = (s_{t+1}/s_t) - 1$  and b) logarithm difference of number of new substances  $Y_t := \ln s_{t+1} - \ln s_t$  for the period 1800-2015.

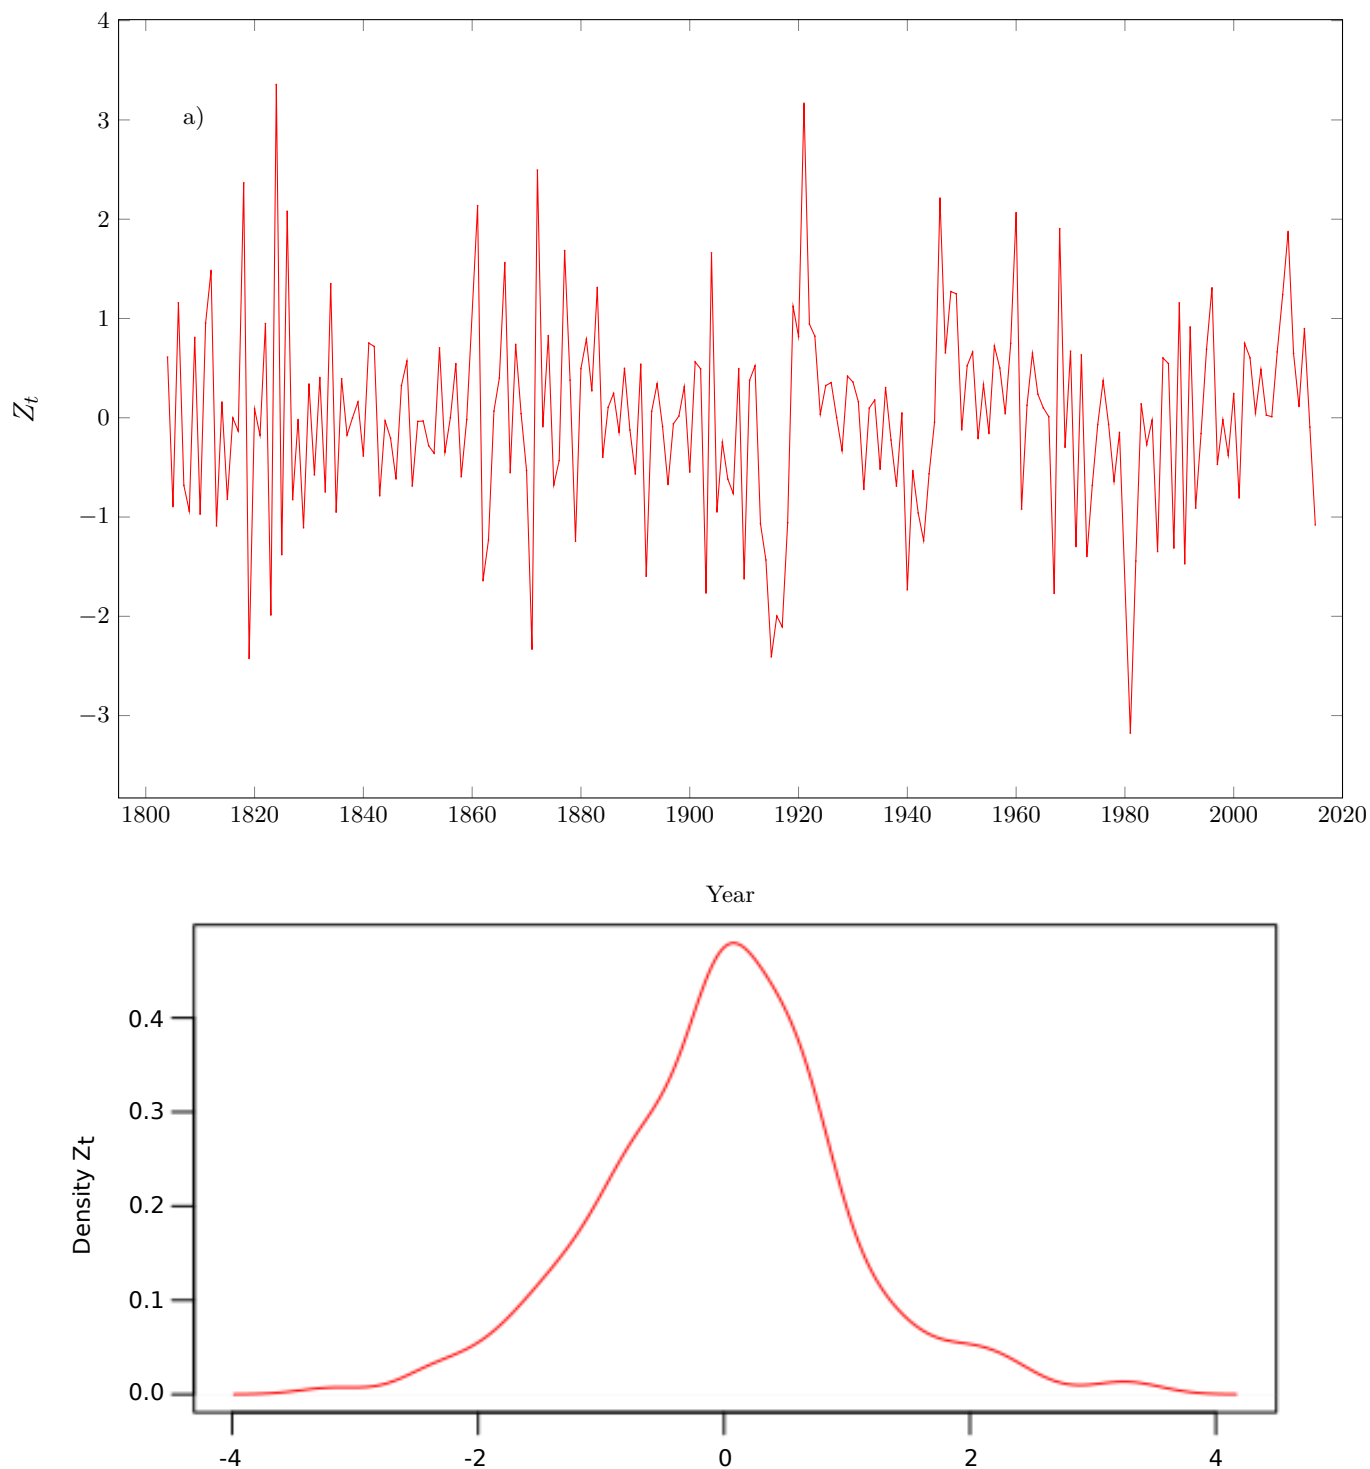

Fig. S2. a) The adjusted noise of logarithm difference during the period 1800-2015. b) The density of residuals of logarithm difference during the period 1800-2015.

## 16 Preferred compositions over time

17 For each compound reported for the first time in year  $t$  we extracted the combination of elements appearing in the formula  
18 of the compound and arranged the elements in lexicographic order, which we call composition. Hence, for HCl and H<sub>2</sub>SO<sub>4</sub>,  
19 the respective compositions are ClH and HOS. Table S2 shows the relative importance of inorganic compositions in the first  
20 regime, and Table S3 the dominance of organic compositions. Likewise, Table S4 shows the preponderance of organic chemistry  
21 compositions in the third regime, where all frequent metal compositions include C, highlighting the organometallic character of  
22 the third regime.

**Table S2. List of the 10 most frequent compositions of elements in some particular years of the first regime. The second half of the table lists the remaining 10 most frequent compositions including metals. Non-carbon compositions in red.**

| 1800     | 1810     | 1820   | 1830   | 1840    | 1850    | 1860   |
|----------|----------|--------|--------|---------|---------|--------|
| CHNaO    | CHAIO    | CHNO   | CHNO   | CHO     | CHN     | CHO    |
| CHNO     | CHNO     | FeO    | HOSZn  | CHNO    | CHNO    | CHNO   |
| CHCuO    | CHKO     | CFeN   | HIKO   | CHCINO  | CHCINPt | CHN    |
| OS       | OPb      | AuHO   | CIHHgN | CHCIO   | AsCaHO  | CHCIO  |
| CuHOS    | CBaO     | CBaN   | OPZn   | FeHKOS  | HNOpt   | CHOS   |
| S        | Pb       | Fe     | CIHIKO | CCIO    | CHFeNO  | CHCI   |
| OSn      | KTe      | FeS    | CuOS   | CHOS    | CHO     | IKSb   |
| CiCuHO   | CFeNS    | CHFeNO | AsO    | CHBrNO  | CHOS    | CHBrP  |
| CiCu     | NaTe     | CrO    | CIHO   | CHCuNO  | CHCIN   | IRbSb  |
| NaOS     | HTe      | CCoO   | CHO    | NaOSb   | CHNOpt  | HINSb  |
| CHgNO    | CHNaO    | HNaOS  | CHNZn  | CHKO    | HNaOSe  | ISbTI  |
| CIHNaOPT | CHCuO    | FeS    | CHNiO  | CHCIOPt | BHOSr   | CHOPb  |
| -        | CuHOS    | Fe     | HNaOP  | CIHNOpt | AsBaHO  | CuHOS  |
| -        | OSn      | CaCIHO | HNiO   | CIHNpt  | BHMgO   | CHOSn  |
| -        | CiCuHO   | AgOS   | CuHOS  | BHMgO   | CFeNO   | CHCaO  |
| -        | CiCu     | P      | FeHOS  | HNaOP   | CHCuNO  | NaOSi  |
| -        | NaOS     | MgO    | CoNO   | CHFeNO  | CIHNOpt | CaHOSe |
| -        | CHgNO    | CKO    | HNOZn  | CHCuO   | CIHNpt  | CHSn   |
| -        | CIHNaOPT | CrS    | CiCoHN | CHAgNOS | HNOptS  | CHISn  |
| -        | -        | CHKMgO | BaHOP  | CHOPb   | CoS     | HNaOS  |

**Table S3. List of the 10 most frequent compositions of elements in some particular years of the second regime. The second half of the table lists the remaining 10 most frequent compositions including metals. Non-carbon compositions in red.**

| 1870     | 1880    | 1890      | 1900     | 1910     | 1920   | 1930     | 1940     | 1950     | 1960     | 1970    | 1980     |
|----------|---------|-----------|----------|----------|--------|----------|----------|----------|----------|---------|----------|
| CHNO     | CHO     | CHNO      | CHNO     | CHNO     | CHNO   | CHNO     | CHNO     | CHNO     | CHNO     | CHNO    | CHNO     |
| CHO      | CHNO    | CHO       | CHO      | CHO      | CHO    | CHO      | CHO      | CHO      | CHO      | CHO     | CHO      |
| CHClO    | CHNOS   | CHN       | CHNOS    | CHNOS    | CHN    | CHNOS    | CHNOS    | CHNOS    | CHNOS    | CHNOS   | CHNOS    |
| CHCINO   | CHN     | CHNS      | CHCINO   | CHCINO   | CHBrO  | CHCINO   | CHCINO   | CHN      | CHCINO   | CHCINO  | CHCINO   |
| CHOS     | CHBrO   | CHNOS     | CHN      | CHN      | CHNOS  | CHBrNO   | CHBrO    | CHCINO   | CHN      | CHN     | CHOS     |
| CHNOS    | CHBrNO  | CHCINO    | CHBrNO   | CHBrNO   | CHClO  | CHN      | CHN      | CHClO    | CHOS     | CHCINOS | CHN      |
| CHN      | CHOS    | CHOS      | CHBrO    | CHBrO    | CHCINO | CHClO    | CHClO    | CHOS     | CHClO    | CHOS    | CHCINOS  |
| CHBrO    | CHBrN   | CHBrO     | CHClO    | CHClO    | CHBrNO | CHBrO    | CHBrNO   | CHBrNO   | CHCINOS  | CHClO   | CHClO    |
| CHCINPt  | CH      | CHClO     | CHCIN    | CHCIN    | CHOS   | CHOS     | CHOS     | CHBrO    | CHNS     | CHNS    | CHBrNO   |
| CH       | CHCINO  | CHBrNO    | CHNS     | CHNS     | CHINO  | CH       | CH       | CHCIN    | CH       | CHFNO   | CHFNO    |
| CHCINPt  | CHNaO   | CHCINPt   | CHCoNOS  | ClCoHNO  | CHNiOS | CHCuNO   | CHClCoNO | CHAgN    | CHNNiO   | CHOSn   | CHCoNO   |
| CHCIPPt  | BaHOPW  | CHAgNO    | CHClHgO  | CHCoNO   | CHHgO  | CHNNiO   | CHCoNO   | CHNNiO   | CHCuNO   | CHCoNO  | CHCuNO   |
| CHNOpt   | HKOPW   | CHNaOS    | CHKNO    | BrCoHNO  | CHITe  | CHClHgNO | CHNNiO   | CHCuNO   | CHCrO    | CHSn    | CHFeO    |
| CHKOS    | CHCuO   | BeNaOSi   | CHCINOPt | CHBrCoNO | CHFeNO | CHCoNO   | CHNOptS  | CHCoNO   | CHOSn    | CHCrNO  | CHNNiO   |
| CHAsClPt | ClMoO   | CHNNaO    | CHCINPt  | CoHNO    | HMoNO  | CHNaOS   | CHCuNOS  | CHHgNO   | CHSn     | CHOSSn  | CHClCoNO |
| HNaOU    | BCIKPt  | CHAgNOS   | CHFeNNaO | CHCrNO   | CHKNOS | CHAgNOS  | CHBrCoNO | CHAg     | CHCINOV  | CHNOSn  | CHFeNO   |
| BrHNPt   | CHAgNO  | CHNNaOS   | CHNNaO   | ClHNTh   | CHIOte | CHAgNO   | CHCuNO   | CHClHgO  | CHAgNO   | CHCuNO  | CHClCuNO |
| CHCINOPt | CHBrHgN | CHCrNOS   | CHHgO    | CoHNOS   | HHgNOS | CHCuNOS  | CHCINNiO | CHHgO    | CHCINNiO | CHCrO   | CHNNaOS  |
| CHINPt   | CHOPb   | AsHNaOS   | CHHgNO   | CHClHgO  | CHIrNO | CHNNiOS  | CHCINNi  | CHOSn    | CHCrNO   | CHClOSn | CHNNaO   |
| CHNOptS  | BBaHO   | CHClCoNPt | CHAIo    | CHClCoO  | CHSn   | CHHgIS   | CHHgIP   | CHClCoNO | CHCINV   | CHFeNO  | CHCINNiO |



**Table S4. List of the 10 most frequent compositions of elements in some particular years of the third regime. The second half of the table lists the remaining 10 most frequent compositions including metals.**

| 1990     | 2000     | 2010     | 2015     |
|----------|----------|----------|----------|
| CHNO     | CHNO     | CHNO     | CHNO     |
| CHO      | CHO      | CHNOS    | CHFNO    |
| CHNOS    | CHNOS    | CHFNO    | CHNOS    |
| CHCINO   | CHCINO   | CHCINO   | CHO      |
| CHOS     | CHFNO    | CHO      | CHCINO   |
| CHFNO    | CHOSi    | CHFNO    | CHFNO    |
| CHN      | CHOS     | CHCINOS  | CHN      |
| CHOSi    | CHCINOS  | CHCIFNO  | CHCIFNO  |
| CHCINOS  | CHN      | CHBrNO   | CHBrNO   |
| CHBrNO   | CHNOSi   | CHN      | CHCINOS  |
| CHCuNO   | CHFeNO   | CHNOZn   | CHNOZn   |
| CHFeNO   | CHNOZn   | CHCuNO   | CHCuNO   |
| CHCoNO   | CHCuNO   | CHNNaOS  | CHFeNO   |
| CHFeO    | CHNNiO   | CHCoNO   | CHCoNO   |
| CHNNaOS  | CHCICuNO | CHCICuNO | CHNNaOS  |
| CHCICuNO | CHCoNO   | CHFeNO   | CHIrN    |
| CHNNiO   | CHNNaOS  | CHNNiO   | CHNNiO   |
| CHNORu   | CHCINORu | CHNNaO   | CHCICuNO |
| CHCICoNO | CHCFeNO  | CHNOPd   | CHCdNO   |
| CHOSn    | CHFNOPRu | CHCuNOS  | CHNOPt   |

## 23 Distance among compositions

24 For each compound we extracted its elemental composition, which corresponds to the elements present in the compound  
25 and that are arranged in lexicographic order. Hence, for  $\text{H}_2\text{SO}_4$  its composition is HOS. The composition of interest for  
26 the chemistry community in year  $t$  is given by  $c(t) = (w_1(t)c_1(t), w_2(t)c_2(t), \dots)$ , where  $w_i(t)$  is the frequency at which the  
27 community reports composition  $c_i(t)$  in year  $t$ . By studying the behavior of  $c(t)$  over time, we want to determine whether the  
28 community has had several compositional interests, or, on the contrary, its interests have been narrow and focused on few  
29 particular compositions. Therefore, we computed the relative frequency  $\bar{w}_i(t)$  of composition  $c_i(t)$  in year  $t$  as:

$$30 \quad \bar{w}_i(t) = \frac{w_i(t)}{\sum_i w_i(t)}$$

31 and calculated the composition distance between successive years as:

$$32 \quad d(t, t+1) = \sum_i |\bar{w}_i(t) - \bar{w}_i(t+1)|.$$

33 Thus, larger values of  $d$  indicate that the community shifts the composition of the reported substances from one year to the  
34 other. In contrast,  $d = 0$  indicates that compositions of year  $t$  remain the same next year.

35 We calculated  $d$  for the time window analyzed (1800-2015) and the resulting plot is shown in Figure S3. It is seen that  $d$   
36 decreases to zero as  $t$  increases, which shows that  $\{\bar{w}_i(t)\}_{t \geq 1}$  behaves like a Cauchy sequence in the composition distribution  
37 space. As a result, we expect the existence in the long run of the limits:

$$38 \quad \bar{w}_i(\infty) = \lim_{t \rightarrow \infty} \bar{w}_i(t),$$

39 i.e. each particular composition has a limit, which is reached when the composition is exhausted.

40 We are interested in the behavior of  $d$  as a function of time, whether it is high or low, increasing or decreasing. A low  $d$   
41 indicates that essentially the same compositions are used over the years. This could happen for two opposite reasons:

42 (1) Chemists try compositions homogeneously, without concentrating on any particular one. This would be an *exploratory*  
43 approach, or

44 (2) they try the same few compositions repeatedly. This would be an extremely *conservative* approach.

45 Another possibility is that

46 (3) they try only a few compositions every year, but different ones from year to year. That would be a *semi-conservative*  
47 approach. It would result in high values of  $d$ .

48 Our results show that  $d$  has dropped over time (Figure S3), indicating that chemists may have populated compositions either  
49 homogeneously (1) or conservatively (2). From Figure S4 we infer that chemists have preferred some compositions over others,  
50 that is they have followed (2) rather than (1). Moreover, Tables S2 to S4 indicate on which narrow set of compositions chemists  
51 have concentrated; in fact, it has been mostly CHNO. In particular, they have definitely not followed strategy (3).

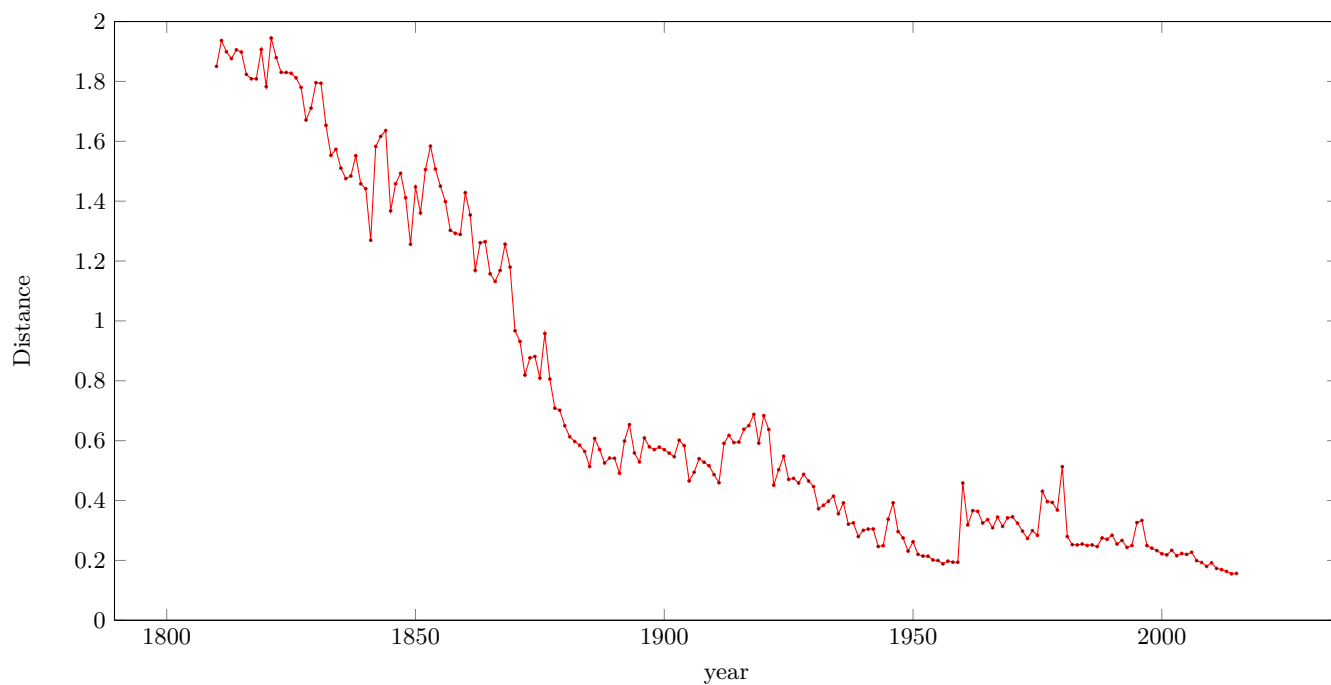

Fig. S3. Distance among elemental compositions of successive years for the period 1800-2015.

52 **Concentration of compositions over time**

53 From each new substance reported in year  $t$ , we extracted its composition, which led to a distribution of compositions  $c_i(t)$  for  
 54  $t$ :  $c(t) = (w_1(t)c_1(t), w_2(t)c_2(t), \dots)$  where  $w_i(t)$  is the number of new substances matching the composition  $c_i(t)$ . The plot  
 55 shows the result by decades, rather than by years; we have simply added the figures for the 10 years of each decade. The  
 56 box-plot of each decade is shown in (Figure S4) with inter whisker distance accounting for 99.9% of the data.

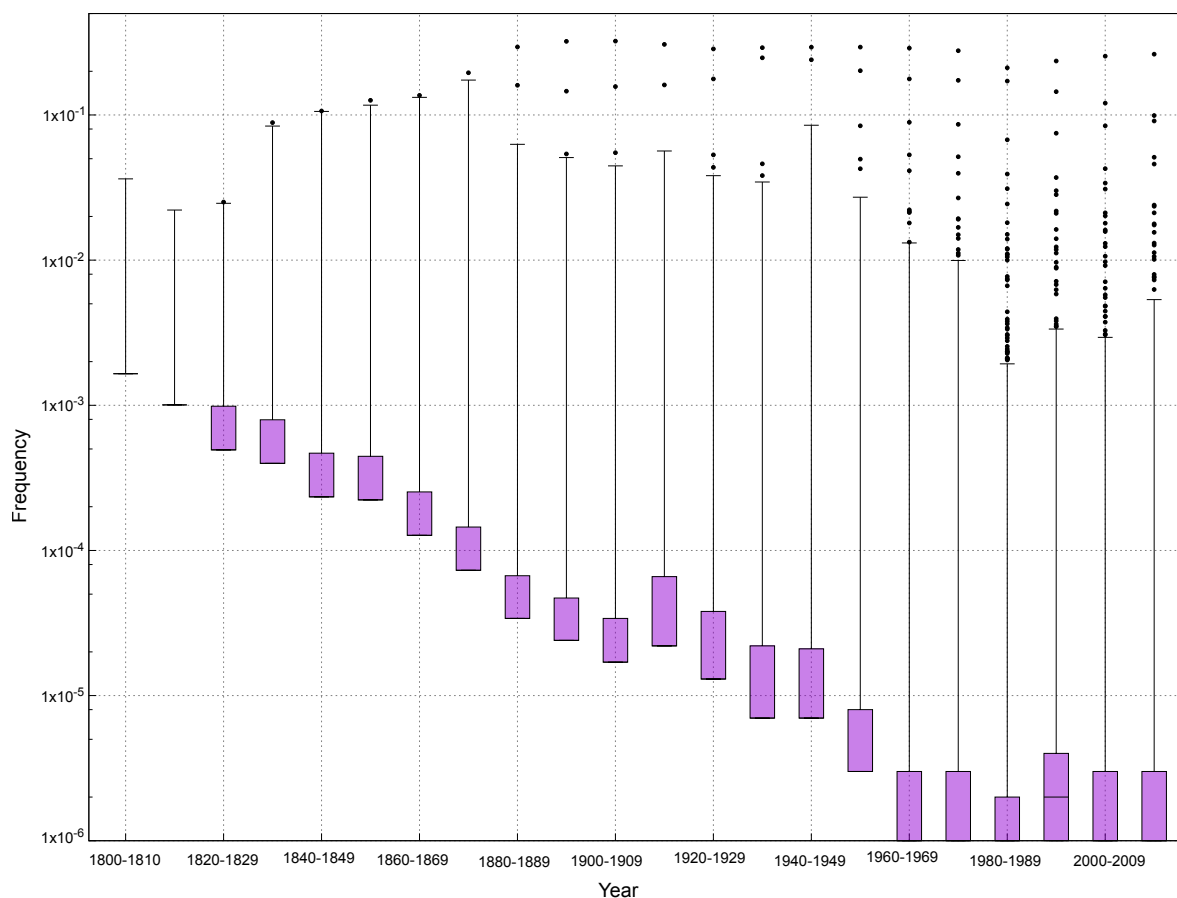

Fig. S4. Box-plots of the compositions every 10 years with inter whisker distance accounting for 99.9% of the data. Relative frequency of compositions are shown at the left axis.

## 57 Growth of families of elements

58 Elements were classified based on the system used in inorganic chemistry textbooks. Here we particularly follow the system by  
 59 Greenwood and Earnshaw (1) adjusted to classification results based on chemical similarity (2). Classes with more than one  
 60 element are: Halogens {F, Cl, Br, I}, Noble gases {He, Ne, Ar, Kr, Xe, Rn}, Alkali metals {Li, Na, K, Rb, Cs, Fr}, Alkaline  
 61 earth metals {Be, Mg, Ca, Sr, Ba, Ra}, {Al, Ga, In, Tl}, {Ge, Sn, Pb}, {As, Sb, Bi}, {Se, Te, Po}, {Ti, Zr, Hf}, {V, Nb, Ta},  
 62 {Cr, Mo, W}, {Mn, Tc, Re}, Platinum metals {Fe, Ru, Os, Co, Rh, Ir, Ni, Pd, Pt}, Coinage metals {Cu, Ag, Au}, {Zn, Cd,  
 63 Hg}, {Ge, Sn, Pb}, Lanthanoids {Sc, Y, La, Ce, Pr, Nd, Pm, Sm, Eu, Gd, Tb, Dy, Ho, Er, Tm, Yb, Lu}, Actinoids {Ac, Th,  
 64 Pa, U, Np, Pu, Am, Cm, Bk, Cf, Es, Fm, Md, No, Lr}.

65 The annual fraction of new compounds that contain at least one element of each family to the total of new compounds is  
 66 plotted in Figures S7 to S8.

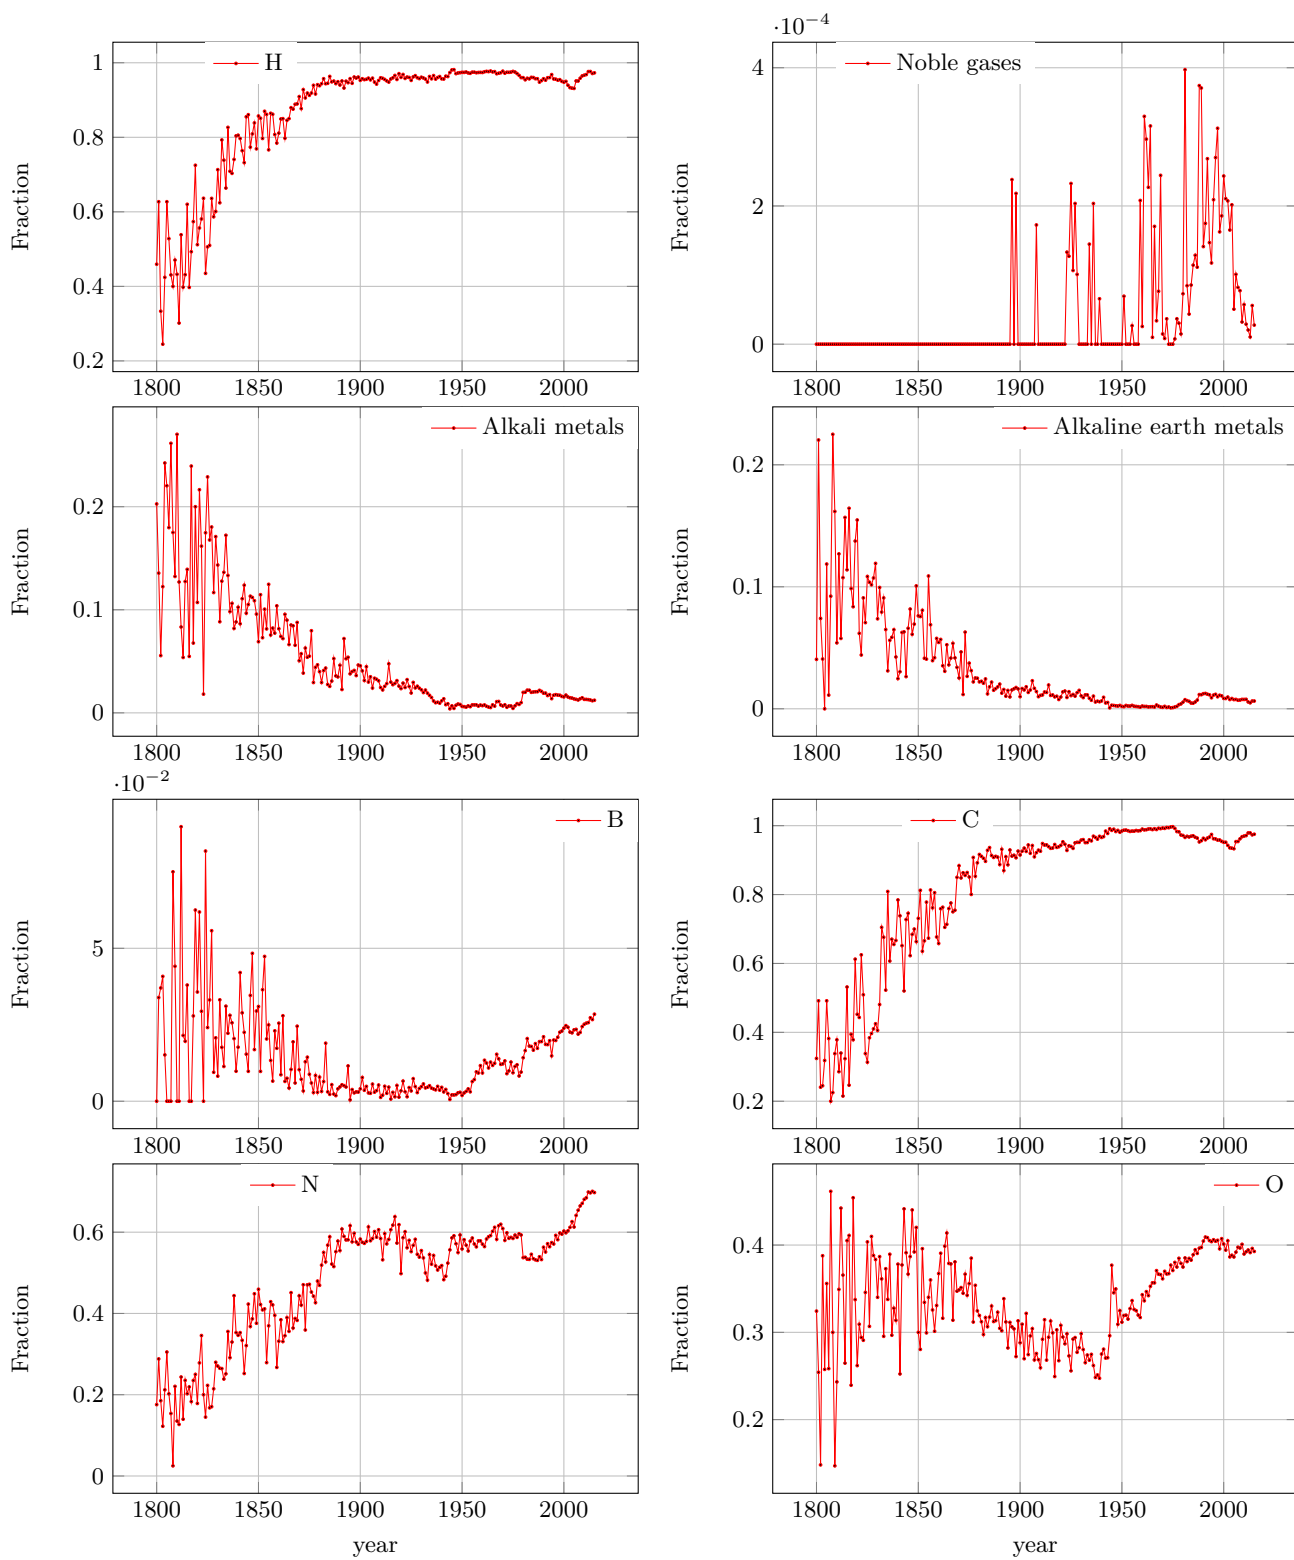

Fig. S5. Fraction of synthesized compounds of the families to the total of new compounds.

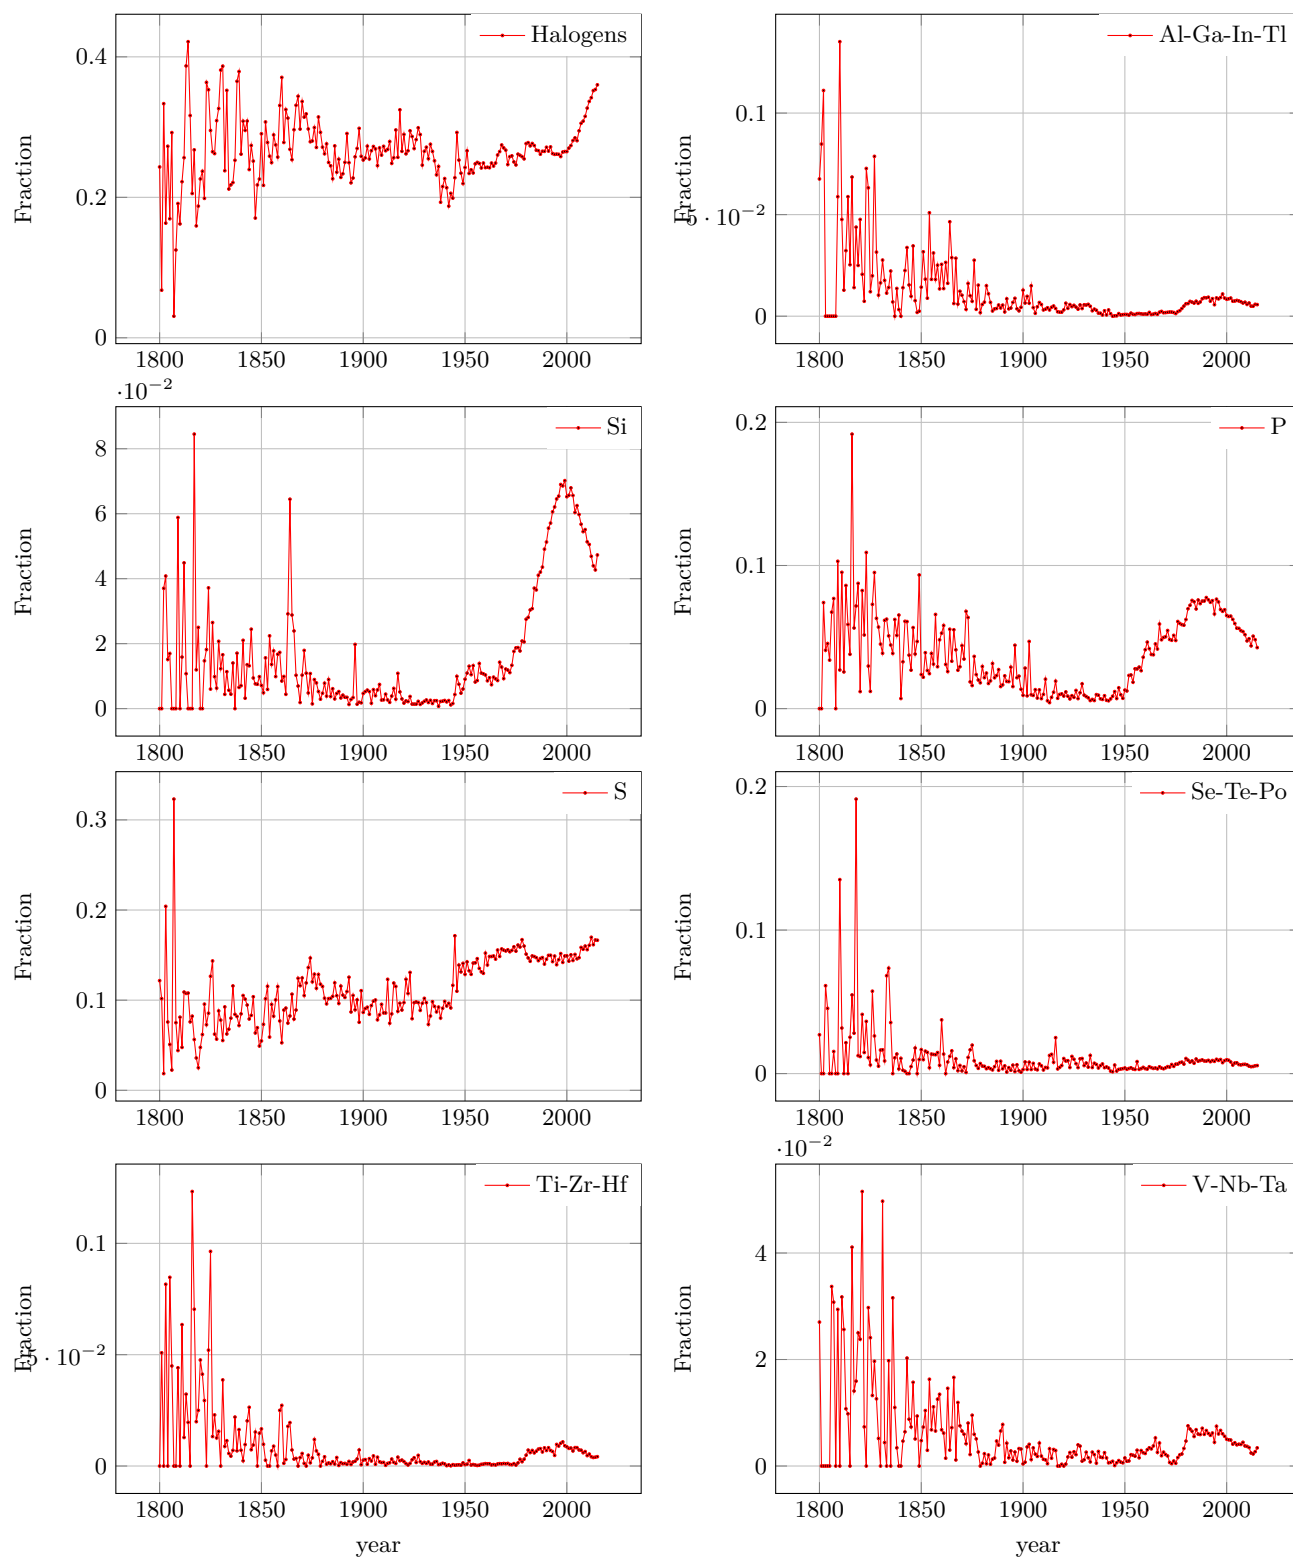

Fig. S6. Fraction of synthesized compounds of the families to the total of new compounds.

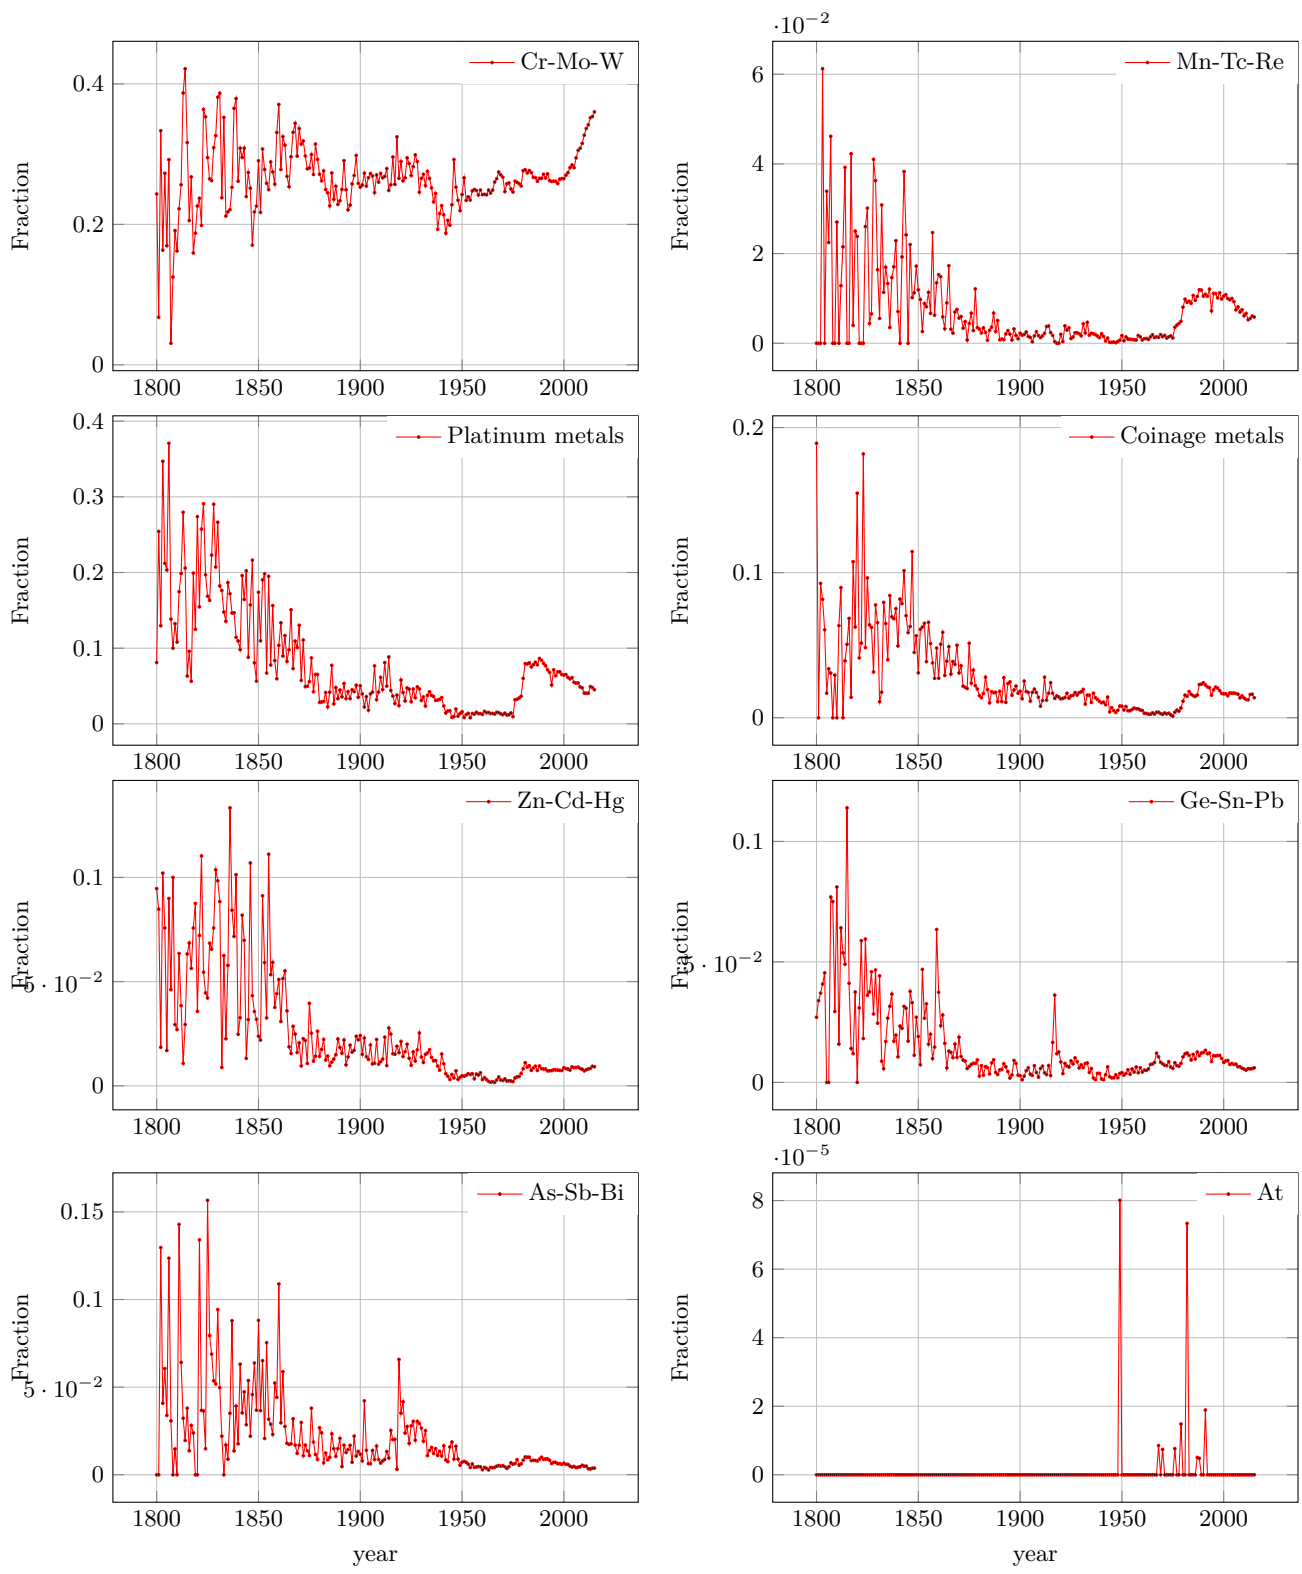

Fig. S7. Fraction of synthesized compounds of the families to the total of new compounds.

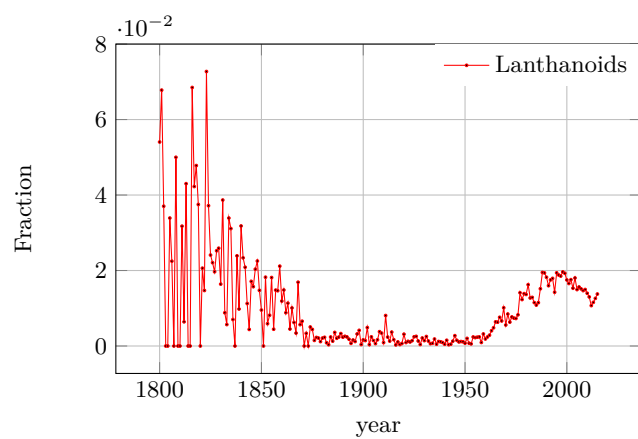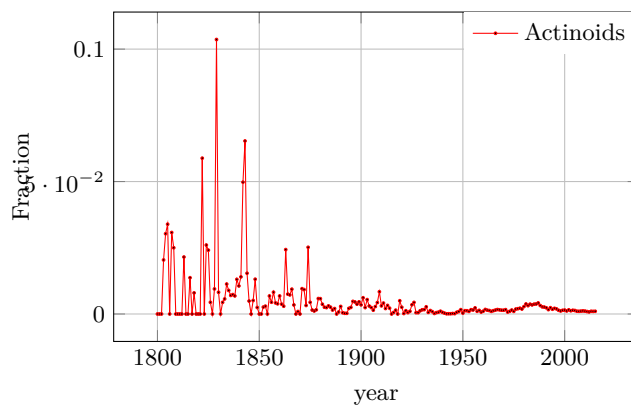

Fig. S8. Fraction of synthesized compounds of the families to the total of new compounds.



<sup>67</sup> **Most synthesized products**

<sup>68</sup> Table [S5](#) shows the top-10 most frequently synthesized products for each one of the nine periods analyzed (main text).

**Table S5. Most synthesized products.**

|    | Before 1860      | 1860-1879        | 1880-1889         | 1900-1919         | 1920-1939         | 1940-1959         | 1960-1979          | 1980-1999                     | 2000-2015       |
|----|------------------|------------------|-------------------|-------------------|-------------------|-------------------|--------------------|-------------------------------|-----------------|
| 1  | NH <sub>3</sub>  | NH <sub>3</sub>  | NH <sub>3</sub>   | NH <sub>3</sub>   | BZA               | H <sub>2</sub> O  | H <sub>2</sub> O   | PhCHO                         | Glc             |
| 2  | H <sub>2</sub> O | CO <sub>2</sub>  | CO <sub>2</sub>   | CO <sub>2</sub>   | NH <sub>3</sub>   | CO <sub>2</sub>   | H <sub>2</sub>     | CO <sub>2</sub>               | CO <sub>2</sub> |
| 3  | CO <sub>2</sub>  | AcOH             | MAC               | BZA               | CO <sub>2</sub>   | CH <sub>2</sub> O | H <sub>2</sub> S   | Ethene                        | PhCHO           |
| 4  | S                | HCl              | BZA               | H <sub>2</sub> O  | MAC               | Methane           | O <sub>2</sub>     | Methane                       | Ph <sub>2</sub> |
| 5  | HCl              | BZA              | H <sub>2</sub> O  | PhNH <sub>2</sub> | AcOH              | AcOH              | CO                 | BZA                           | CuO             |
| 6  | O <sub>2</sub>   | MAC              | PhNH <sub>2</sub> | AcOH              | H <sub>2</sub> O  | BZA               | CO <sub>2</sub>    | C <sub>6</sub> H <sub>6</sub> | H <sub>2</sub>  |
| 7  | Cl <sub>2</sub>  | H <sub>2</sub> O | AcOH              | OA                | OA                | Acetone           | B(OH) <sub>3</sub> | PhAc                          | ZnO             |
| 8  | Hg               | OA               | OA                | MAC               | FA                | HCl               | Ag                 | CO                            | PhAc            |
| 9  | SO <sub>2</sub>  | H <sub>2</sub> S | HCl               | PhCHO             | CH <sub>2</sub> O | MAC               | N <sub>2</sub>     | Ph <sub>2</sub>               | BZA             |
| 10 | H <sub>2</sub>   | S                | EtOH              | HCl               | HCl               | NH <sub>3</sub>   | FC                 | Acetone                       | CO              |

Abbreviations: AcOH (Acetic acid), Ag (Silver), B(OH)<sub>3</sub> (Boric acid), BZA (Benzoic acid), C<sub>6</sub>H<sub>6</sub> (Benzene), CH<sub>2</sub>O (Formaldehyde), Cl<sub>2</sub> (Chlorine), CO (Carbon monoxide), CO<sub>2</sub> (Carbon dioxide), CuO (Copper(II) oxide), EDBB (1,1'-(1,2-ethanediyl)bisbenzene), EtOH (Ethanol), FA (Formic acid), FC (Ferrocene), Glc (Glucose), H<sub>2</sub> (Hydrogen), H<sub>2</sub>O (Water), HCl (Hydrochloric acid), Hg (Mercury), H<sub>2</sub>S (Hydrogen sulfide), MAC (Methylammonium carbonate), N<sub>2</sub> (Nitrogen), NH<sub>3</sub> (Ammonia), O<sub>2</sub> (Oxygen), OA (Oxalic acid), Ph<sub>2</sub> (Biphenyl), PhAc (Acetophenone), PhCHO (Benzaldehyde), PhNH<sub>2</sub> (Aniline), S (Sulphur), SO<sub>2</sub> (Sulfur dioxide), ZnO (Zinc oxide).

69 **Analysis of the distribution of substrates**

70 The hypothesis that frequency distributions  $p(R)$  of the number of different reactions  $R$  in which substrates have participated  
71 in period  $t$  follow power-law, normal, exponential and Poisson distributions models were tested using the `powerlaw` package (3).  
72 The mathematical expressions for these distributions are shown in Table S6 (4). To test whether the experimental distribution  
73 follows one of the given distributions in Table S6, a goodness-of-fit test was used (3), which generates a  $p$ -value that is based  
74 on the distance between the experimental distribution and the hypothesized distribution (4). In general, if  $p \leq 0.1$ , the  
75 hypothesized distribution is ruled out. Table S7 shows the results for the distributions of the nine periods and their parameters  
76 for substrates.

**Table S6.** Definition of power-law, normal, exponential and Poisson distributions. For each distribution, the basic functional form  $f(R)$  is given along with the normalization constant  $C$  such that  $\sum_{R=R_{min}}^{\infty} C f(R) = 1$ , where  $R_{min}$  is the minimum  $R$  value from which the distributions begins to apply. The general expression for these distributions is  $p(R) = C f(R)$ .

| Name        | $f(R)$                                                 | $C$                                                                                           |
|-------------|--------------------------------------------------------|-----------------------------------------------------------------------------------------------|
| Power law   | $R^{-\alpha}$                                          | $1 / \sum_{n=0}^{\infty} (n + R_{min})^{-\alpha}$                                             |
| Exponential | $e^{-\lambda R}$                                       | $(1 - e^{-\lambda}) e^{\lambda R_{min}}$                                                      |
| Poisson     | $\mu^R / R!$                                           | $[e^{\mu} - \sum_{k=0}^{R_{min}-1} \frac{\mu^k}{k!}]^{-1}$                                    |
| Log-normal  | $\frac{1}{R} \exp[-\frac{(\ln R - \mu)^2}{2\sigma^2}]$ | $\sqrt{\frac{2}{\pi\sigma^2}} [\text{erfc}^*(\frac{\ln R_{min} - \mu}{\sqrt{2}\sigma})]^{-1}$ |

\*erfc stands for the complementary error function (5).

**Table S7. Parameters and  $p$ -values for the distributions shown in Table S6, when applied to the distribution of substrates. The  $p$ -values were calculated running 1,000 simulations.**

| Period      | Parameters                                          |                                                     |                                                      |                                                                             |
|-------------|-----------------------------------------------------|-----------------------------------------------------|------------------------------------------------------|-----------------------------------------------------------------------------|
|             | Power-law                                           | Exponential                                         | Poisson                                              | Log-normal                                                                  |
| Before 1860 | $R_{min} = 2$<br>$\alpha = 1.963773$<br>$p = 0.01$  | $R_{min} = 13$<br>$\lambda = 0.03506312$<br>$p = 0$ | $R_{min} = 13$<br>$\mu = 41.02849$<br>$p = 0$        | $R_{min} = 2$<br>$\mu = -5.196269$<br>$\sigma = 2.827289$<br>$p = 0.374$    |
| 1860-1879   | $R_{min} = 1$<br>$\alpha = 2.016267$<br>$p = 0$     | $R_{min} = 1$<br>$\lambda = 0.7320951$<br>$p = 0$   | $R_{min} = 771$<br>$\mu = 1106$<br>$p = 0.089$       | $R_{min} = 1$<br>$\mu = -6.733486$<br>$\sigma = 2.985701$<br>$p = 0.291$    |
| 1880-1899   | $R_{min} = 9$<br>$\alpha = 2.113$<br>$p = 0.49$     | $R_{min} = 1$<br>$\lambda = 0.6836599$<br>$p = 0$   | $R_{min} = 4398$<br>$\mu = 4815.667$<br>$p = 0.587$  | $R_{min} = 2$<br>$\mu = -15.148219$<br>$\sigma = 4.012288$<br>$p = 0$       |
| 1900-1919   | $R_{min} = 3$<br>$\alpha = 2.177336$<br>$p = 0$     | $R_{min} = 1$<br>$\lambda = 0.6561324$<br>$p = 0$   | $R_{min} = 3839$<br>$\mu = 6352.571$<br>$p = 0.038$  | $R_{min} = 18$<br>$\mu = -50.422936$<br>$\sigma = 7.343984$<br>$p = 0.587$  |
| 1920-1939   | $R_{min} = 2$<br>$\alpha = 2.160733$<br>$p = 0$     | $R_{min} = 1$<br>$\lambda = 0.6735098$<br>$p = 0$   | $R_{min} = 4177$<br>$\mu = 8774.154$<br>$p = 0$      | $R_{min} = 27$<br>$\mu = -19.421922$<br>$\sigma = 4.956338$<br>$p = 0.837$  |
| 1940-1959   | $R_{min} = 18$<br>$\alpha = 2.011466$<br>$p = 0.11$ | $R_{min} = 1$<br>$\lambda = 0.7368087$<br>$p = 0$   | $R_{min} = 8638$<br>$\mu = 13026.17$<br>$p = 0.029$  | $R_{min} = 23$<br>$\mu = -15.601899$<br>$\sigma = 4.544417$<br>$p = 0.916$  |
| 1960-1979   | $R_{min} = 1$<br>$\alpha = 2.340214$<br>$p = 0$     | $R_{min} = 2$<br>$\lambda = 0.8119482$<br>$p = 0$   | $R_{min} = 3574$<br>$\mu = 7080.636$<br>$p = 0.001$  | $R_{min} = 50$<br>$\mu = -0.3703384$<br>$\sigma = 2.3445863$<br>$p = 0.927$ |
| 1980-1999   | $R_{min} = 1$<br>$\alpha = 2.341685$<br>$p = 0$     | $R_{min} = 1$<br>$\mu = 0.8174186$<br>$p = 0$       | $R_{min} = 23031$<br>$\mu = 41872.17$<br>$p = 0.064$ | $R_{min} = 94$<br>$\mu = -3.513336$<br>$\sigma = 3.218282$<br>$p = 0.101$   |
| 2000-2015   | $R_{min} = 5$<br>$\alpha = 2.114837$<br>$p = 0$     | $R_{min} = 2$<br>$\mu = 0.8376273$<br>$p = 0$       | $R_{min} = 46242$<br>$\mu = 61491.5$<br>$p = 0.052$  | $R_{min} = 1$<br>$\mu = -1035.13808$<br>$\sigma = 28.84289$<br>$p = 0.064$  |

## 77 Analysis of jumps for substrates

78 The distribution of participation of compounds in  $R$  different reactions as substrates for the following periods is shown in  
79 Figure 2a (main text): Period 1 (Before 1860), Period 2 (1860-1879), Period 3 (1880-1899), Period 4 (1900-1919), Period 5  
80 (1920-1939), Period 6 (1940-1959), Period 7 (1960-1979), Period 8 (1980-1999), Period 9 (2000-2015).

81 We found that the participation of substrates in less than 21 reactions ( $R \leq 20$ ) accounts for 98% of the whole variance of  
82 the distribution (Figure 2a, main text). Therefore, we plotted (Figure S9) the logarithm growth of participation of compounds  
83 in  $R \leq 20$  different reactions as substrates in the nine periods of Figure 2a. The least squares regression method shows that the  
84 logarithm growth of participation of compounds  $\log \text{Comp}_i$ , with  $i = 1, \dots, 9$  follows the equation

$$85 \quad \log \text{Comp}_i = 0.7839528i + 7.9552287 + \text{Residual}_i,$$

86 where  $\text{Residual}_1 = 0.174906828$ ,  $\text{Residual}_2 = -0.084145563$ ,  $\text{Residual}_3 = 0.221563190$ ,  $\text{Residual}_4 = -0.107935989$ ,  $\text{Residual}_5 =$   
87  $-0.237065832$ ,  $\text{Residual}_6 = -0.300628224$ ,  $\text{Residual}_7 = -0.073863858$ ,  $\text{Residual}_8 = 0.397940841$ , and  $\text{Residual}_9 = 0.009228608$ .

88 These residuals pass the Shapiro-Wilk and Kolmogorov-Smirnov normality tests for mean 0 and standard deviation  
89  $sd = 0.2260776$ , with the corresponding probabilities  $p^{SW} = 0.7444$  and  $p^{KS} = 0.8711$ . There are two historical jumps,  
90 namely between 1860-1879 and 1880-1899, and between 1960-1979 and 1980-1999, corresponding to  $\text{Residual}_3 = 0.221563190$   
91 and  $\text{Residual}_8 = 0.397940841$ , which are higher than the other residuals, and still in the range  $(-2sd, 2sd)$ . As a result, the  
92 logarithm difference  $\log \text{Comp}_i - \log \text{Comp}_{i-1}$ , with  $i = 2, \dots, 9$  reaches the highest and the second highest at these two periods.

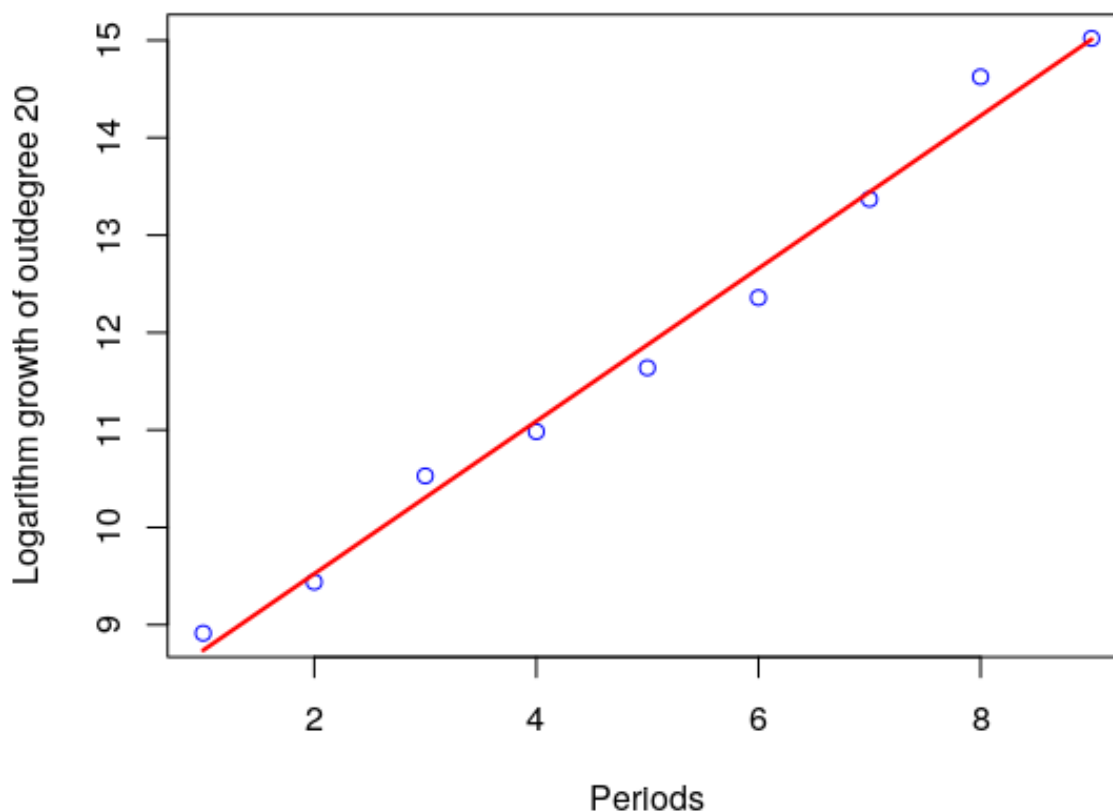

Fig. S9. Logarithm growth of participation of compounds in  $R \leq 20$  different reactions as substrates in the nine periods.

## 93 Analysis of the distribution of products

94 The hypothesis that frequency distributions  $p(R)$  of the number of different reactions  $R$  in which products have participated  
95 in period  $t$  follow power-law, normal, exponential and Poisson distributions models were tested using the the powerLaw  
96 package (3). The mathematical expressions for these distributions are shown in Table S6 (4). To test whether the experimental

97 distribution follows one of the given distributions in Table S6, a goodness-of-fit test was used (3), which generates a  $p$ -value that  
98 is based on the distance between the experimental distribution and the hypothesized distribution (4). In general, if  $p \leq 0.1$ , the  
99 hypothesized distribution is ruled out. Table S8 shows the results for the distributions of the nine periods and their parameters  
100 for products.

**Table S8. Parameters and  $p$ -values for the distributions shown in Table S6, when applied to the distribution of products. The  $p$ -values were calculated running 1,000 simulations.**

| Period      | Parameters                                           |                                                     |                                                    |                                                                            |
|-------------|------------------------------------------------------|-----------------------------------------------------|----------------------------------------------------|----------------------------------------------------------------------------|
|             | Power-law                                            | Exponential                                         | Poisson                                            | Log-normal                                                                 |
| Before 1860 | $R_{min} = 2$<br>$\alpha = 2.314181$<br>$p = 0.049$  | $R_{min} = 59$<br>$\mu = 0.0187567$<br>$p = 0.718$  | $R_{min} = 161$<br>$\mu = 203.6254$<br>$p = 0.207$ | $R_{min} = 1$<br>$\mu = -718.58135$<br>$\sigma = 23.31244$<br>$p = 0.049$  |
| 1860-1879   | $R_{min} = 1$<br>$\alpha = 2.451058$<br>$p = 0$      | $R_{min} = 68$<br>$\mu = 0.01125429$<br>$p = 0.941$ | $R_{min} = 1$<br>$\mu = 1.671426$<br>$p = 0$       | $R_{min} = 1$<br>$\mu = -16.007938$<br>$\sigma = 3.667497$<br>$p = 0.011$  |
| 1880-1899   | $R_{min} = 5$<br>$\alpha = 2.479312$<br>$p = 0.513$  | $R_{min} = 2$<br>$\mu = 0.8289619$<br>$p = 0$       | $R_{min} = 1$<br>$\mu = 1.511293$<br>$p = 0$       | $R_{min} = 1$<br>$\mu = -3.909269$<br>$\sigma = 1.944246$<br>$p = 0$       |
| 1900-1919   | $R_{min} = 8$<br>$\alpha = 2.467412$<br>$p = 0.476$  | $R_{min} = 2$<br>$\mu = 0.8198701$<br>$p = 0$       | $R_{min} = 1$<br>$\mu = 1.435699$<br>$p = 0$       | $R_{min} = 1$<br>$\mu = -1.929820$<br>$\sigma = 1.488447$<br>$p = 0$       |
| 1920-1939   | $R_{min} = 11$<br>$\alpha = 2.388553$<br>$p = 0.881$ | $R_{min} = 2$<br>$\mu = 0.8359276$<br>$p = 0$       | $R_{min} = 1$<br>$\mu = 1.333986$<br>$p = 0$       | $R_{min} = 20$<br>$\mu = -17.738687$<br>$\sigma = 4.029873$<br>$p = 0.881$ |
| 1940-1959   | $R_{min} = 1$<br>$\alpha = 2.947494$<br>$p = 0$      | $R_{min} = 2$<br>$\mu = 1.148441$<br>$p = 0$        | $R_{min} = 1$<br>$\mu = 0.7163911$<br>$p = 0$      | $R_{min} = 1$<br>$\mu = -3.183353$<br>$\sigma = 1.522464$<br>$p = 0$       |
| 1960-1979   | $R_{min} = 1$<br>$\alpha = 4.126991$<br>$p = 0$      | $R_{min} = 63$<br>$\mu = 0.0152121$<br>$p = 0.13$   | $R_{min} = 1$<br>$\mu = 0.2046896$<br>$p = 0$      | $R_{min} = 1$<br>$\mu = -10.352775$<br>$\sigma = 2.075666$<br>$p = 0$      |
| 1980-1999   | $R_{min} = 1$<br>$\alpha = 3.211598$<br>$p = 0$      | $R_{min} = 2$<br>$\mu = 0.9182153$<br>$p = 0$       | $R_{min} = 1$<br>$\mu = 0.576151$<br>$p = 0$       | $R_{min} = 1$<br>$\mu = -8.801885$<br>$\sigma = 2.259969$<br>$p = 0$       |
| 2000-2015   | $R_{min} = 1$<br>$\alpha = 3.672836$<br>$p = 0$      | $R_{min} = 2$<br>$\mu = 0.9465415$<br>$p = 0$       | $R_{min} = 1$<br>$\mu = 0.3613914$<br>$p = 0$      | $R_{min} = 1$<br>$\mu = -206.291472$<br>$\sigma = 9.765858$<br>$p = 0$     |



101 **Similarity of distribution of products**

102 The distance between frequency distributions of participation of compounds in  $R$  different reactions as products of Figure 2b  
103 (main text) is given by:

104 
$$d(d_i, d_j) = \frac{\sum_{k=1}^{20} |f_i(R_k) - f_j(R_k)|}{f_i(R_k) + f_j(R_k)},$$

105 where  $d_i$  is a frequency distribution and  $f_i(R_i)$  is the frequency of participation of products in  $R_i$  reactions. Note that only  
106 products obtained in less than 21 reactions ( $R \leq 20$ ) were considered, for they account for 97% of the whole variance of the  
107 distributions (Figure 2b, main text). The results of the pair-wise distances for the nine periods shown in Figure 2b are found in  
108 Table S9. It is observed that the closest distributions are  $d_8$  and  $d_9$ , which correspond to periods 1980-1999 and 2000-2015,  
109 respectively.

**Table S9. Distances between distributions of Figure 2b (main text).**

|             | 1860-1879 | 1880-1899 | 1900-1919 | 1920-1939 | 1940-1959 | 1960-1979 | 1980-1999 | 2000-2015 |
|-------------|-----------|-----------|-----------|-----------|-----------|-----------|-----------|-----------|
| Before 1860 | 6.00659   | 13.8973   | 15.4195   | 17.3573   | 17.4216   | 15.2836   | 19.5405   | 19.5062   |
| 1860-1879   |           | 10.0815   | 12.4142   | 15.4533   | 15.6046   | 12.5027   | 19.1822   | 19.1245   |
| 1880-1899   |           |           | 3.54215   | 8.94705   | 9.52587   | 5.48084   | 17.7134   | 17.5695   |
| 1900-1919   |           |           |           | 5.90002   | 6.70359   | 4.84538   | 16.87     | 16.688    |
| 1920-1939   |           |           |           |           | 2.06348   | 7.05896   | 14.6438   | 14.3598   |
| 1940-1959   |           |           |           |           |           | 6.10315   | 14.2749   | 14.0378   |
| 1960-1979   |           |           |           |           |           |           | 15.5765   | 15.6039   |
| 1980-1999   |           |           |           |           |           |           |           | 1.00596   |

## 110 Analysis of jumps for products

111 The distribution of participation of compounds in  $R$  different reactions as products for the following periods is shown in Figure  
112 2b (main text): Period 1 (Before 1860), Period 2 (1860-1879), Period 3 (1880-1899), Period 4 (1900-1919), Period 5 (1920-1939),  
113 Period 6 (1940-1959), Period 7 (1960-1979), Period 8 (1980-1999), Period 9 (2000-2015).

114 We found that the participation of products in less than 21 reactions ( $R \leq 20$ ) accounts for 97% of the whole variance of the  
115 distribution (Figure 2b, main text). Therefore, we plotted (Figure S10) the logarithm growth of participation of compounds in  
116  $R \leq 20$  different reactions as products in the nine periods of Figure 2b. The least squares regression method shows that the  
117 logarithm growth of participation of compounds  $\log \text{Comp}_i$ , with  $i = 1, \dots, 9$  follows the equation

$$\log \text{Comp}_i = 0.8447904i + 8.3520785 + \text{Residual}_i,$$

119 where  $\text{Residual}_1 = 0.04787297$ ,  $\text{Residual}_2 = -0.17878533$ ,  $\text{Residual}_3 = 0.28512578$ ,  $\text{Residual}_4 = -0.07595590$ ,  $\text{Residual}_5 =$   
120  $-0.20859164$ ,  $\text{Residual}_6 = -0.16903558$ ,  $\text{Residual}_7 = 0.35814213$ ,  $\text{Residual}_8 = 0.16272740$ , and  $\text{Residual}_9 = -0.22149983$ .

121 These residuals pass the Shapiro-Wilk and Kolmogorov-Smirnov normality tests for mean 0 and standard deviation  
122  $sd = 0.2228266$ , with the corresponding probabilities  $p^{SW} = 0.1398$  and  $p^{KS} = 0.6966$ . There are two historical jumps,  
123 namely between 1860-1879 and 1880-1899, and between 1940-1959 and 1960-1979, corresponding to  $\text{Residual}_3 = 0.28512578$   
124 and  $\text{Residual}_7 = 0.35814213$ , which are higher than the standard deviation  $sd = 0.2228266$  (and also higher than the other  
125 residuals), and still in the range  $(-2sd, 2sd)$ . As a result, the logarithm difference  $\log \text{Comp}_i - \log \text{Comp}_{i-1}$ , with  $i = 2, \dots, 9$   
126 reaches the highest and the second highest at these two periods.

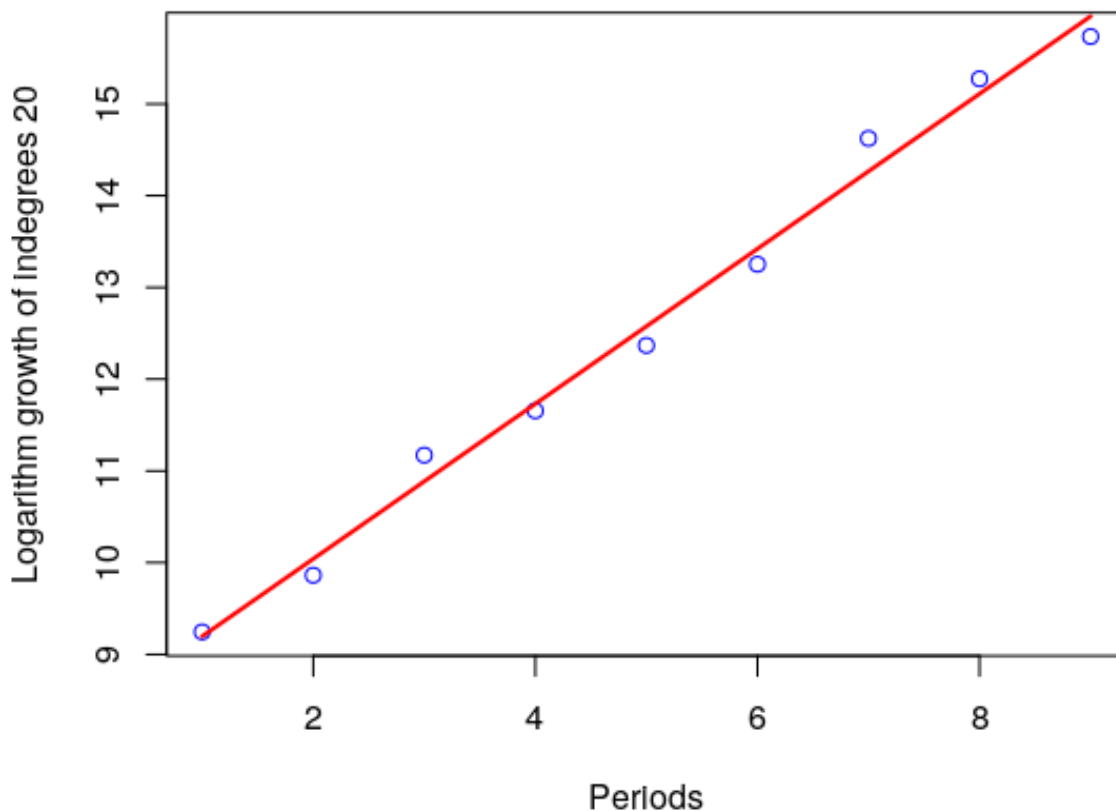

Fig. S10. Logarithm growth of participation of compounds in  $R \leq 20$  different reactions as products in the nine periods.

## 127 Analysis of the distribution of targets

128 The frequency distributions of the number of reactions  $R$  producing the same target is shown in Figure S11.

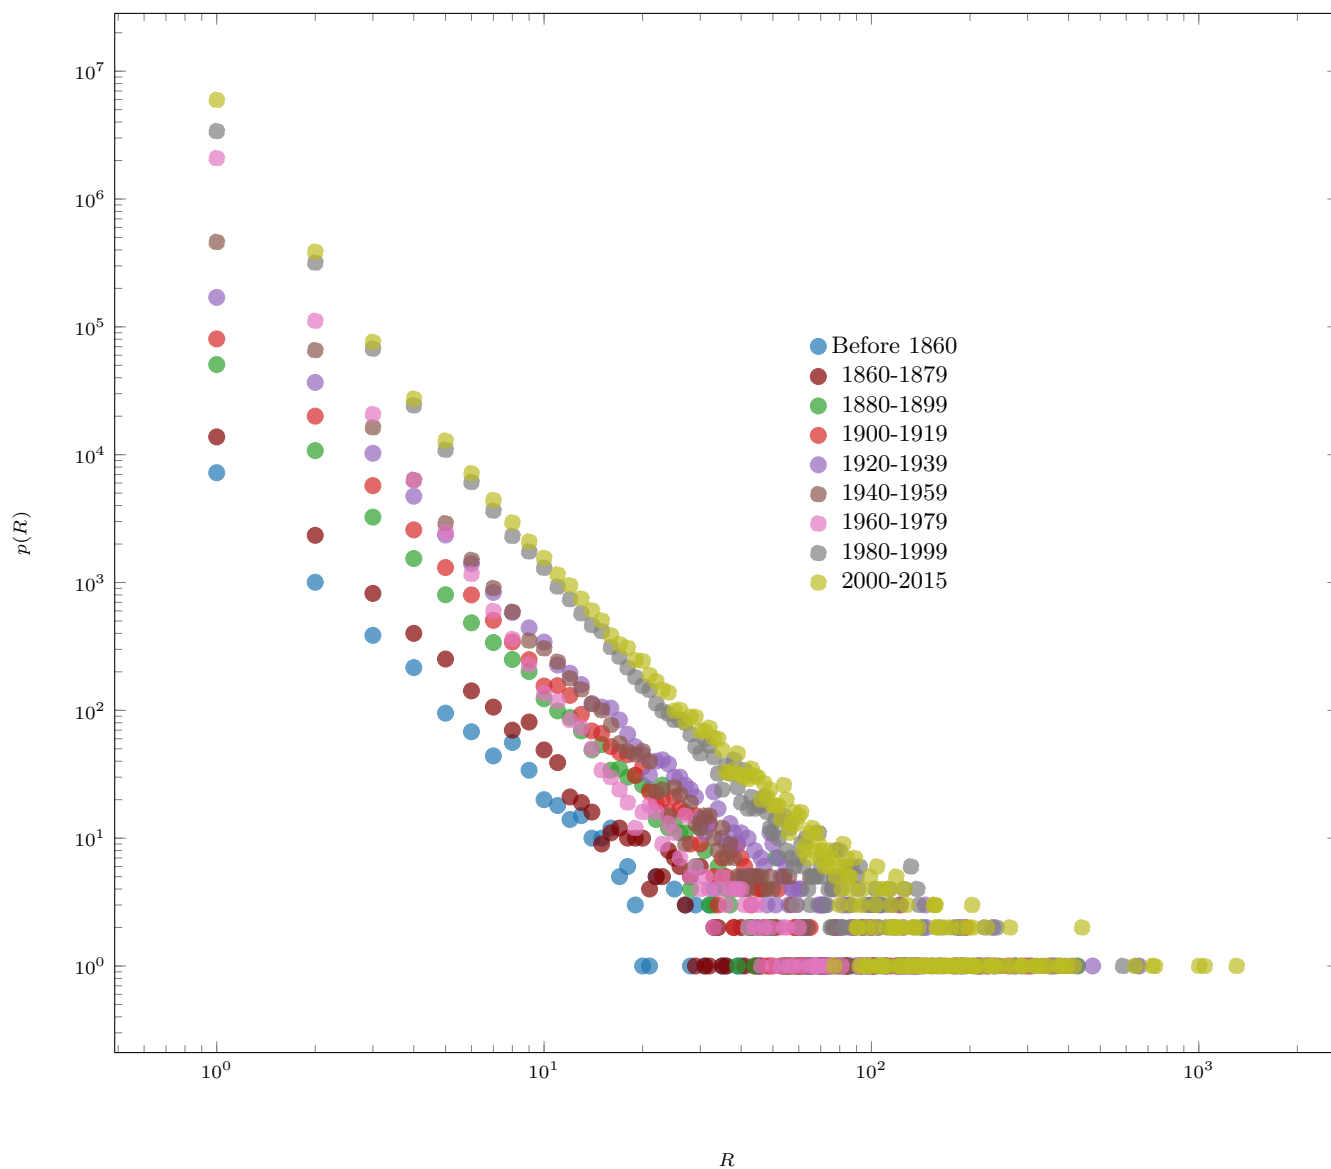

**Fig. S11.** Frequency distributions of number of reactions  $R$  producing the same target.

129 The hypothesis that frequency distributions  $p(R)$  of the number of different reactions  $R$  in which targets have participated  
130 in period  $t$  follow power-law, normal, exponential and Poisson distributions models were tested using the `powerLaw` package (3).  
131 The mathematical expressions for these distributions are shown in Table S6 (4). To test whether the experimental distribution  
132 follows one of the given distributions in Table S6, a goodness-of-fit test was used (3), which generates a  $p$ -value that is based  
133 on the distance between the experimental distribution and the hypothesized distribution (4). In general, if  $p \leq 0.1$ , the  
134 hypothesized distribution is ruled out. Table S10 shows the results for the distributions of the nine periods and their parameters  
135 for targets.

**Table S10. Parameters and  $p$ -values for the distributions shown in Table S6, when applied to the distribution of targets. The  $p$ -values were calculated running 1,000 simulations.**

| Period      | Parameters                                          |                                                     |                                                   |                                                                            |
|-------------|-----------------------------------------------------|-----------------------------------------------------|---------------------------------------------------|----------------------------------------------------------------------------|
|             | Power-law                                           | Exponential                                         | Poisson                                           | Log-normal                                                                 |
| Before 1860 | $R_{min} = 2$<br>$\alpha = 2.417702$<br>$p = 0.186$ | $R_{min} = 17$<br>$\mu = 0.06030108$<br>$p = 0.171$ | $R_{min} = 56$<br>$\mu = 63.30087$<br>$p = 0.721$ | $R_{min} = 1$<br>$\mu = -30.626118$<br>$\sigma = 4.792057$<br>$p = 0.186$  |
| 1860-1879   | $R_{min} = 1$<br>$\alpha = 2.532562$<br>$p = 0.189$ | $R_{min} = 12$<br>$\mu = 0.08234484$<br>$p = 0.003$ | $R_{min} = 1$<br>$\mu = 1.269463$<br>$p = 0$      | $R_{min} = 1$<br>$\mu = -7.279544$<br>$\sigma = 2.480881$<br>$p = 0.197$   |
| 1880-1899   | $R_{min} = 3$<br>$\alpha = 2.658096$<br>$p = 0.223$ | $R_{min} = 84$<br>$\mu = 0.01255286$<br>$p = 0.67$  | $R_{min} = 1$<br>$\mu = 1.216067$<br>$p = 0$      | $R_{min} = 5$<br>$\mu = -5.920010$<br>$\sigma = 2.291455$<br>$p = 0.584$   |
| 1900-1919   | $R_{min} = 3$<br>$\alpha = 2.795804$<br>$p = 0.001$ | $R_{min} = 47$<br>$\mu = 0.01875625$<br>$p = 0.064$ | $R_{min} = 1$<br>$\mu = 1.197611$<br>$p = 0$      | $R_{min} = 7$<br>$\mu = -20.806110$<br>$\sigma = 3.752783$<br>$p = 0.001$  |
| 1920-1939   | $R_{min} = 7$<br>$\alpha = 2.636928$<br>$p = 0.063$ | $R_{min} = 90$<br>$\mu = 0.01074621$<br>$p = 0.514$ | $R_{min} = 1$<br>$\mu = 1.094216$<br>$p = 0$      | $R_{min} = 11$<br>$\mu = -11.385738$<br>$\sigma = 3.071208$<br>$p = 0.738$ |
| 1940-1959   | $R_{min} = 2$<br>$\alpha = 3.339249$<br>$p = 0$     | $R_{min} = 68$<br>$\mu = 0.0181202$<br>$p = 0.886$  | $R_{min} = 1$<br>$\mu = 0.5954598$<br>$p = 0$     | $R_{min} = 1$<br>$\mu = -2.467482$<br>$\sigma = 1.333142$<br>$p = 0$       |
| 1960-1979   | $R_{min} = 1$<br>$\alpha = 4.198562$<br>$p = 0$     | $R_{min} = 1$<br>$\mu = 2.454067$<br>$p = 0$        | $R_{min} = 1$<br>$\mu = 0.1825004$<br>$p = 0$     | $R_{min} = 1$<br>$\mu = -6.231822$<br>$\sigma = 1.609130$<br>$p = 0$       |
| 1980-1999   | $R_{min} = 1$<br>$\alpha = 3.479212$<br>$p = 0$     | $R_{min} = 2$<br>$\mu = 1.154287$<br>$p = 0$        | $R_{min} = 1$<br>$\mu = 0.390401$<br>$p = 0$      | $R_{min} = 1$<br>$\mu = -6.062233$<br>$\sigma = 1.795392$<br>$p = 0$       |
| 2000-2015   | $R_{min} = 1$<br>$\alpha = 3.855568$<br>$p = 0$     | $R_{min} = 2$<br>$\mu = 0.954044$<br>$p = 0$        | $R_{min} = 1$<br>$\mu = 0.2859205$<br>$p = 0$     | $R_{min} = 1$<br>$\mu = -118.983190$<br>$\sigma = 7.210826$<br>$p = 0$     |

136 **References**

- 137 1. Greenwood NN, Earnshaw A (1998) *Chemistry of the elements*. (Butterworth Heinemann).  
138 2. Leal W, Restrepo G, Bernal A (2012) A network study of chemical elements: From binary compounds to chemical trends.  
139 *MATCH Commun. Math. Comput. Chem.* 68:417–442.  
140 3. Gillespie C (2015) Fitting heavy tailed distributions: The powerlaw package. *Journal of Statistical Software, Articles*  
141 64(2):1–16.  
142 4. Clauset A, Shalizi C, Newman M (2009) Power-law distributions in empirical data. *SIAM Review* 51(4):661–703.  
143 5. Gautschi W (1972) *Error function and Fresnel integrals*, eds. Abramowitz M, Stegun IA. (Dover), p. 299.
